# Supplementary material
Source: PubMed Central journal article supplement (PMC4803501)
Supplement: NIHMS766705-supplement-table_e1.pdf [file NIHMS766705-supplement-table_e1.pdf]

**Table 1** Treatment parameters for the 10 patients

| Patient | Center of GTV motion (mm) | GTV (cm <sup>3</sup> ) | CTV (cm <sup>3</sup> ) | Number of beams | Total number of spots | Total MU |
|---------|---------------------------|------------------------|------------------------|-----------------|-----------------------|----------|
| 1       | 9                         | 64.4                   | 242.4                  | 2               | 8133                  | 208.74   |
| 2       | 9                         | 70.7                   | 196.3                  | 3               | 10874                 | 279.63   |
| 3       | 17                        | 42.8                   | 158.9                  | 2               | 5868                  | 196.98   |
| 4       | 7                         | 80.4                   | 299.8                  | 3               | 14662                 | 310.15   |
| 5       | 5                         | 46.6                   | 166.9                  | 3               | 7257                  | 194.23   |
| 6       | 8                         | 165.5                  | 539.6                  | 2               | 18447                 | 462.07   |
| 7       | 10                        | 110.3                  | 395.1                  | 3               | 15332                 | 361.07   |
| 8       | 8                         | 73.1                   | 203.3                  | 3               | 17333                 | 324.12   |
| 9       | 12                        | 51.9                   | 289.5                  | 3               | 15590                 | 328.89   |
| 10      | 8                         | 46.6                   | 191.6                  | 3               | 7147                  | 164.33   |

*Abbreviations:* GTV = gross tumor volume; CTV = clinical target volume.
