# Supplementary material
Source: PubMed Central journal article supplement (PMC4803501)

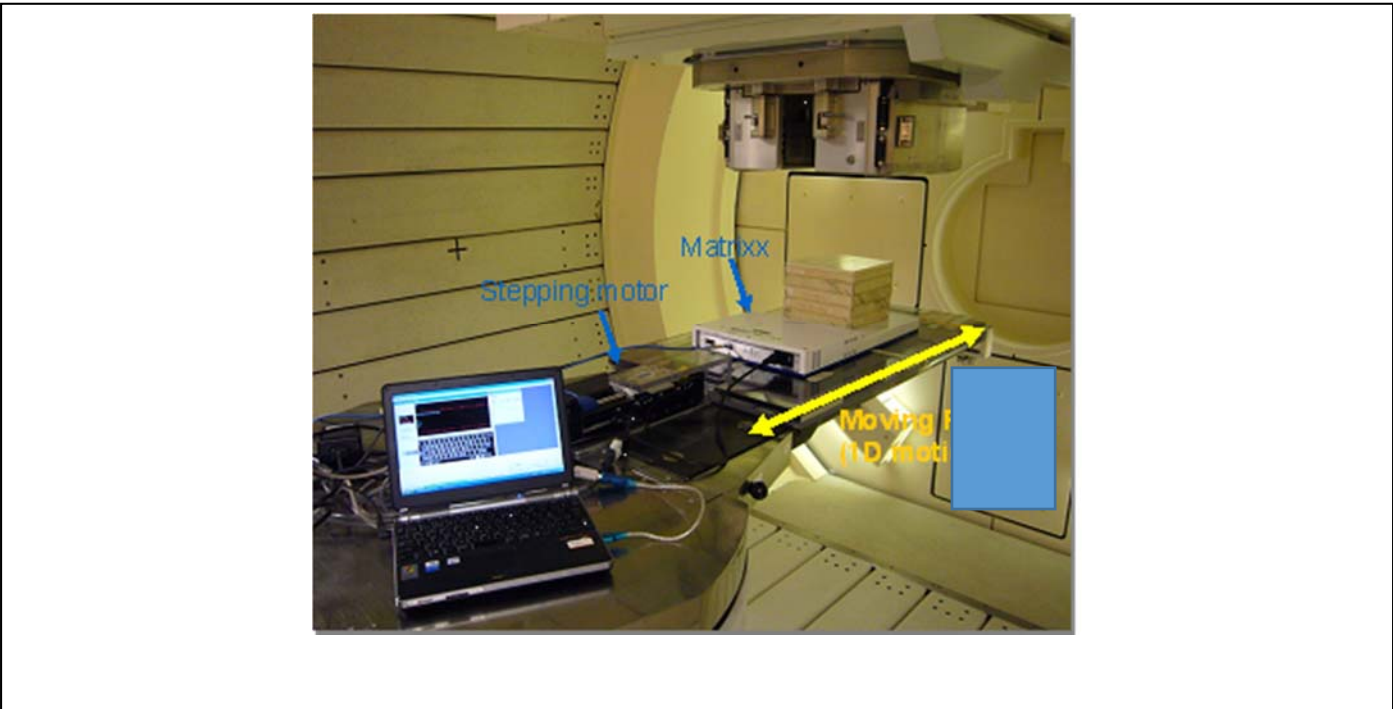

Figure s1

Supplement: NIHMS766705-supplement-figure_e1.pdf [file NIHMS766705-supplement-figure_e1.pdf]

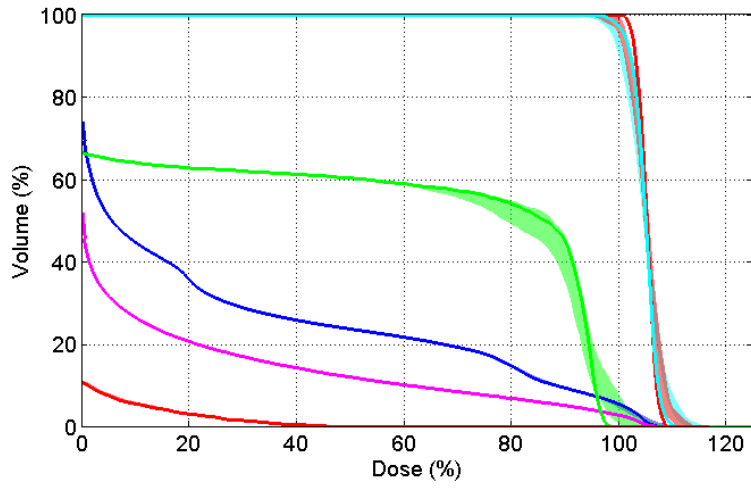

(a)

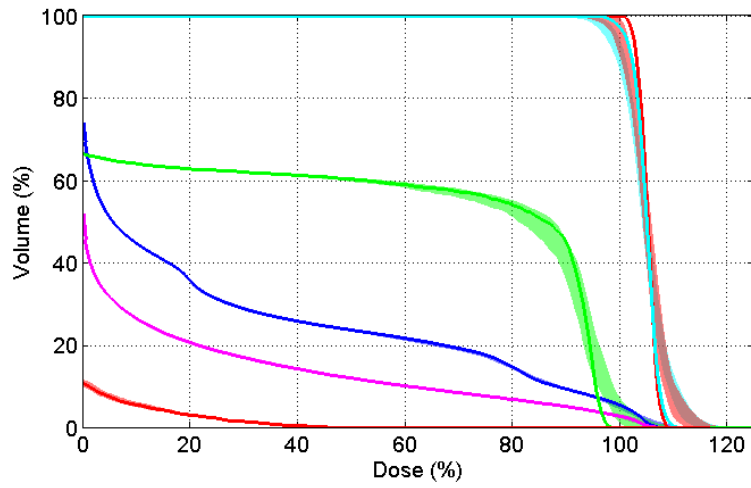

(b)

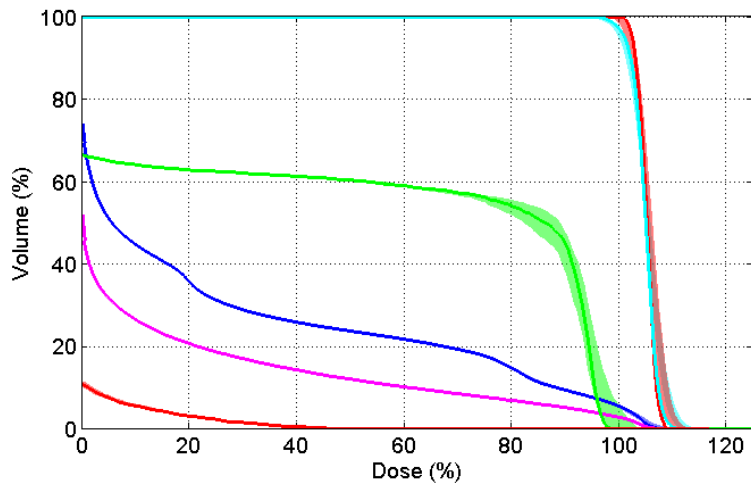

(c)

Figure s2

Supplement: NIHMS766705-supplement-figure_e2.pdf [file NIHMS766705-supplement-figure_e2.pdf]
